# Supplementary material for: Predicting SARS-CoV-2 Variant Spread in a Completely Seropositive Population Using Semi-Quantitative Antibody Measurements in Blood Donors
Source: MDPI journal article supplement (doi:10.3390/vaccines10091437), 2022-08-31
Supplement: s1 [file s1]

## Supplemental material

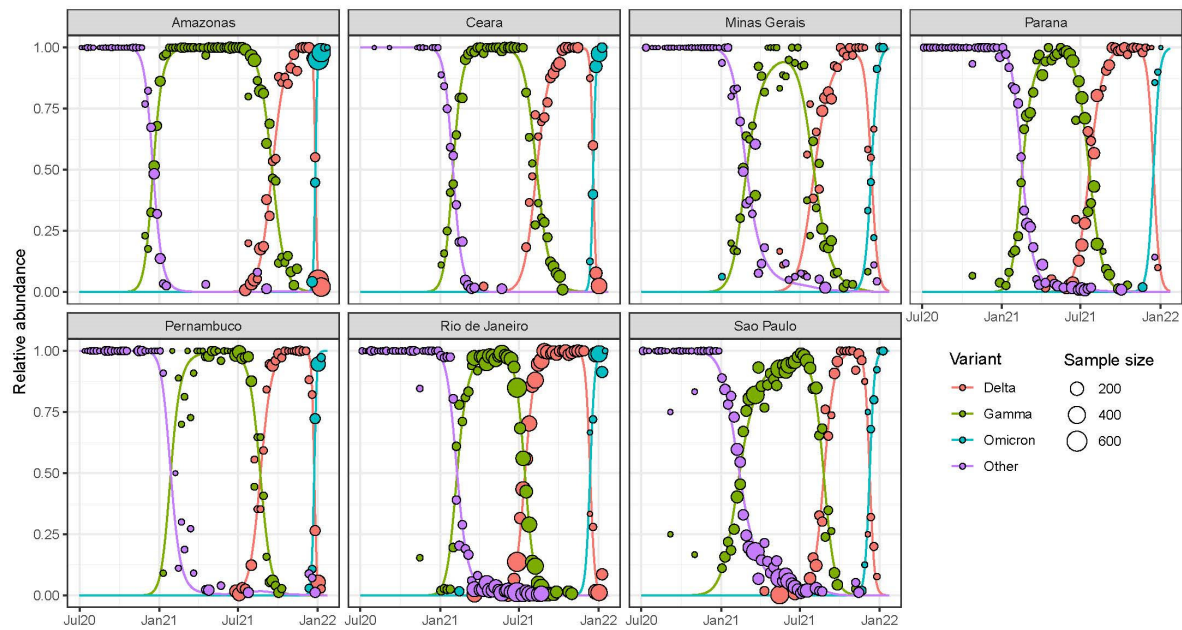

**Figure S1.** The metadata for all SARS-CoV-2 sequences deposited on GISAID between Jul 2020 and Jan 2022 (<https://www.gisaid.org/>) were downloaded. The lines show the predictions of a multinomial model fit using the nnet package in R. “Other” refers principal to wild type virus and P.2.

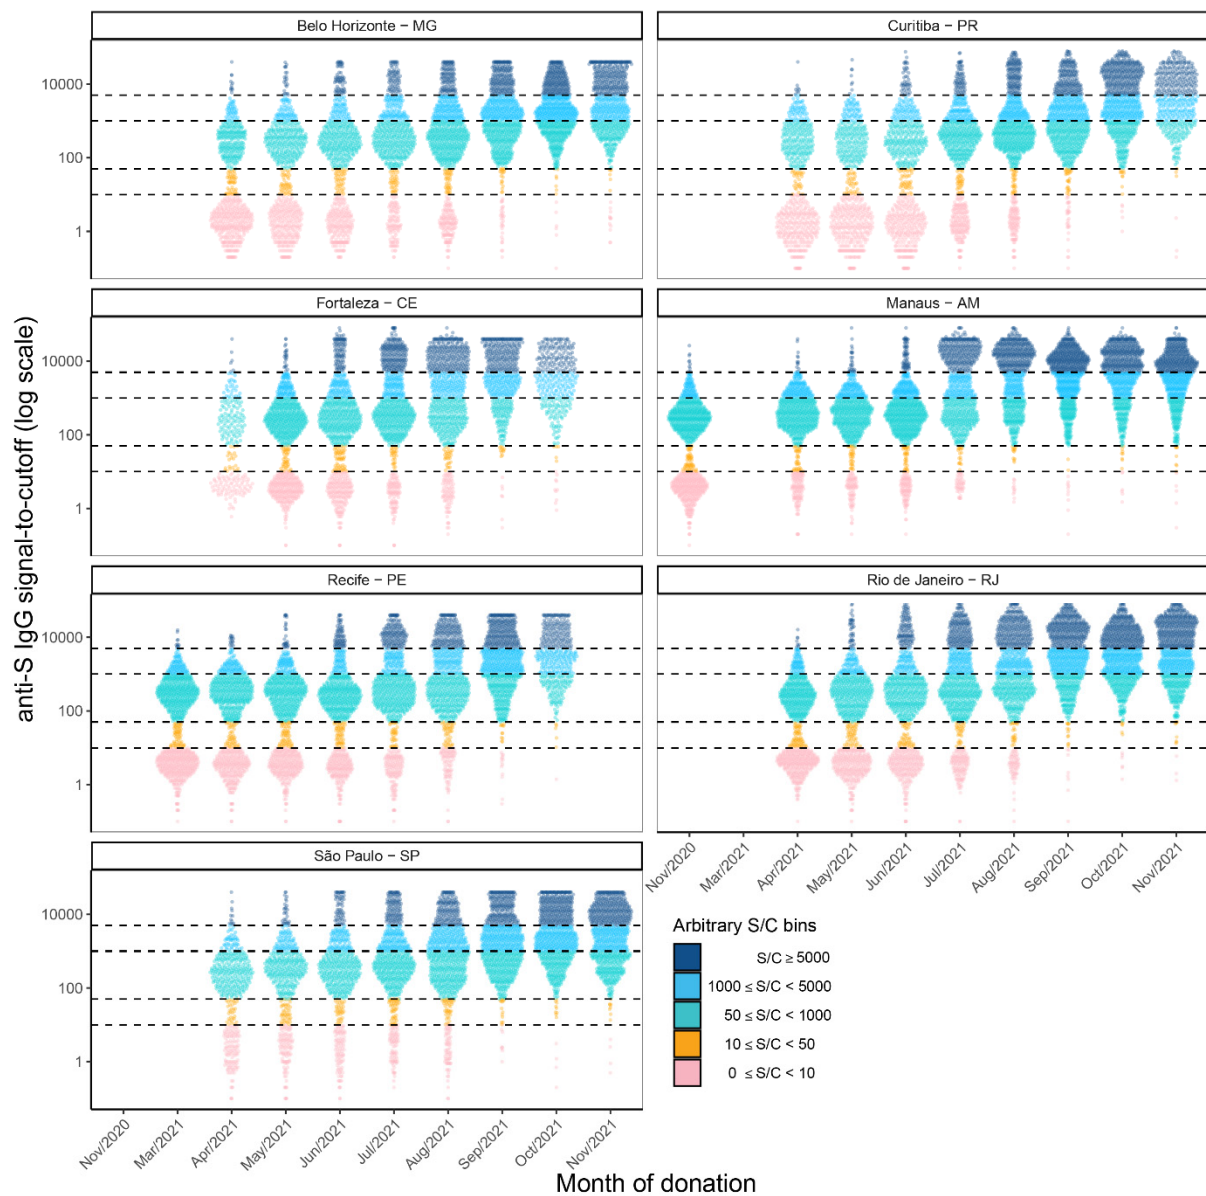

**Figure S2.** Raw signal to cut-off readings for each month blood donor sample across the seven Brazilian state capital cities. A threshold of 50 S/C is defined as a positive assay, other thresholds are arbitrary and shown to aid visualization.

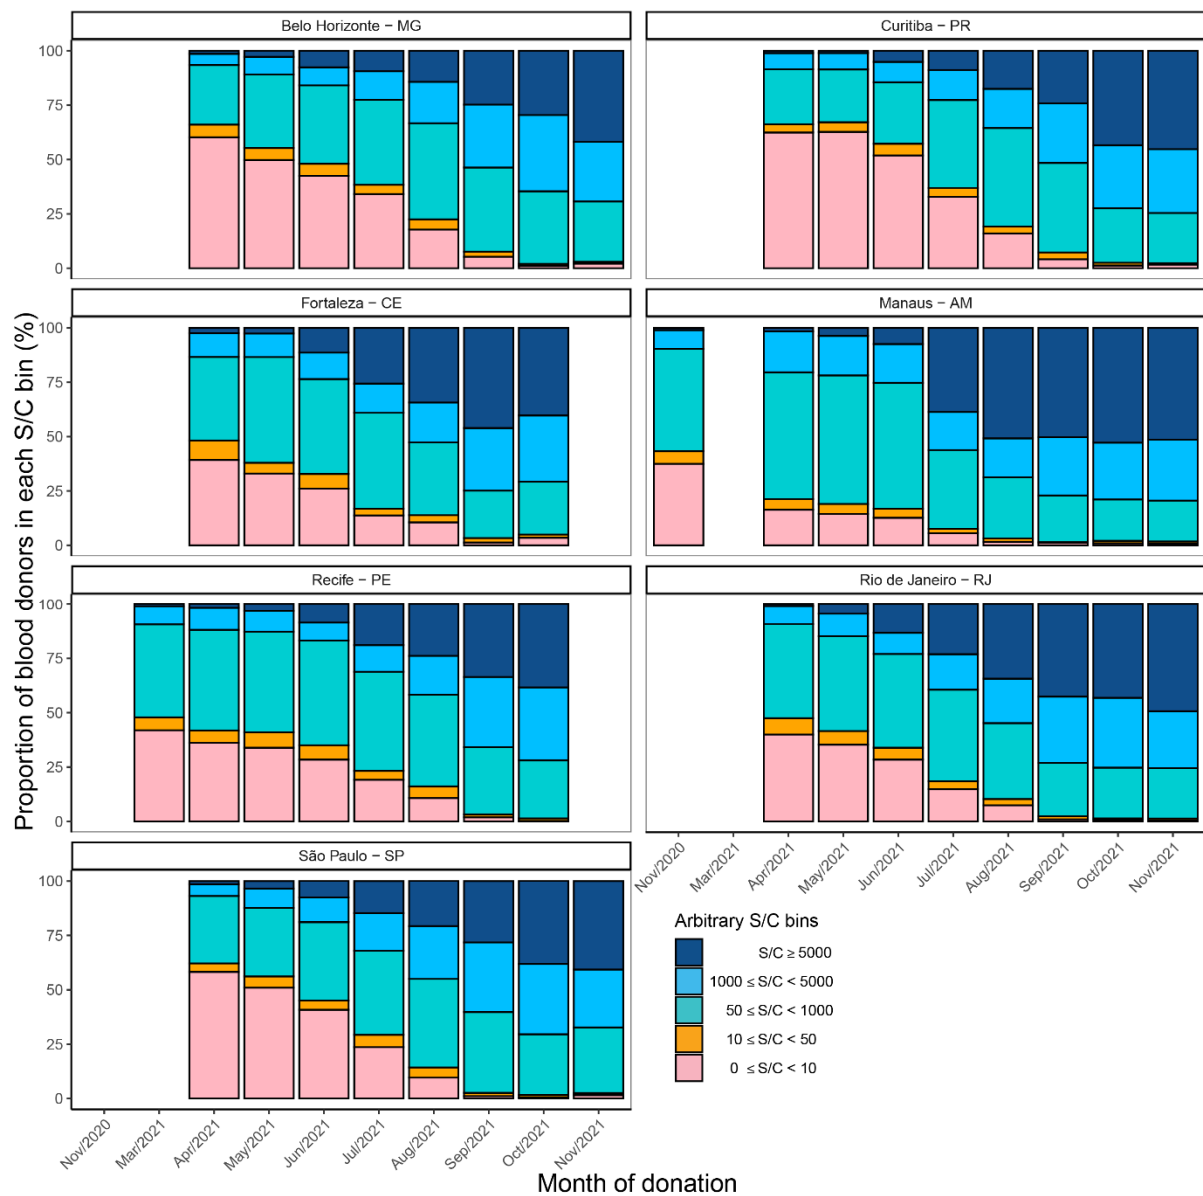

**Figure S3.** Proportion of blood donor samples falling in arbitrary S/C bins each month across seven Brazilian state capitals.

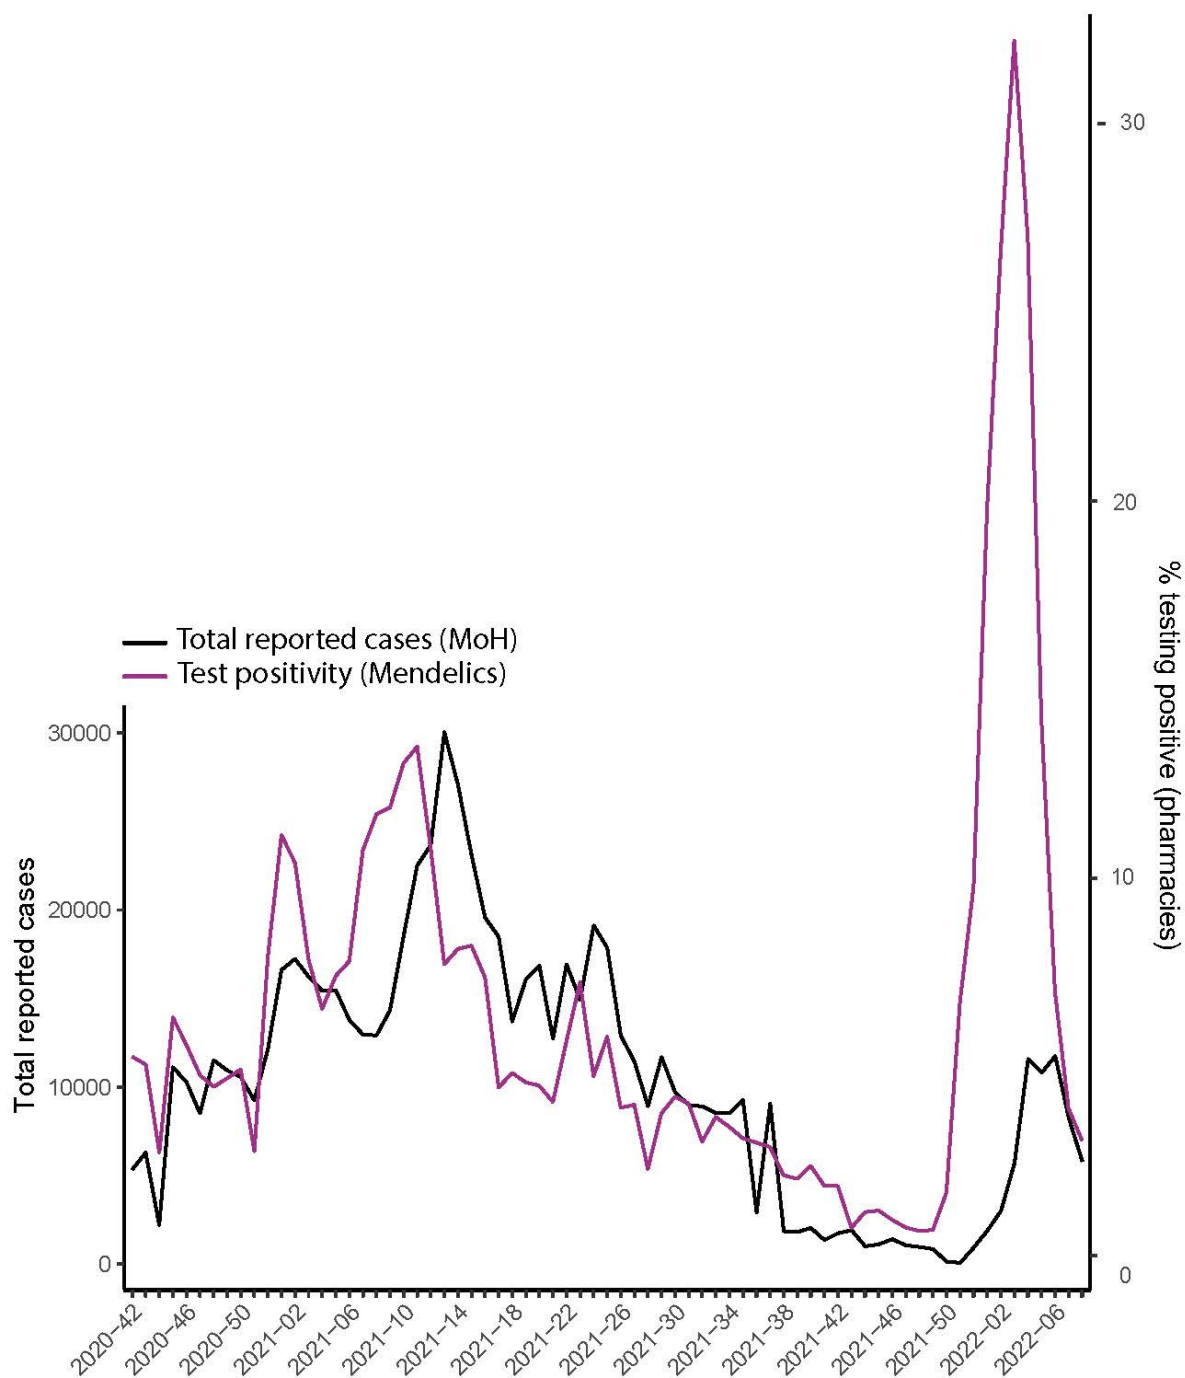

**Figure S4.** Black line (LHS y-axis) - total number of reported cases in Sao Paulo city (<https://www.covid.saude.br/>) shown per week of reporting. Purple line (RHS y-axis) shows the % positivity of tests administered in pharmacies in Sao Paulo by Mendelics (<https://mendelics.com.br/>).
